# Supplementary material for: Metagenome-based Exploration of Bacterial Communities Associated with Cyanobacteria Strains Isolated from Thermal Muds
Source: Preprints.org preprint supplement (doi:10.20944/preprints202209.0219.v1), 2022-09-15
Supplement: Supplementary file 1 [file supplementary]

## Sheet: Supplementary table S1 NCBI
Supp. table S1. NCBI accession numbers for Balaruc's cyanibacterial strains
Species	Strain	BioProject	Title	BioSample	Title
Planktothricoides raciborskii	PMC 877.14	PRJNA686238	Planktothricoides raciborskii PMC 877.14 Metagenome sequencing and assembly	SAMN17109571	MIMAG Metagenome-assembled Genome sample from Planktothricoides raciborskii culture
				SAMN29994055	MIMS Environmental/Metagenome sample from Planktothricoides raciborskii PMC 877.14 non axenic culture
Laspinema sp.	PMC 878.14	PRJNA686242	Laspinema sp. PMC 878.14 Metagenome sequencing and assembly	SAMN17109585	MIMAG Metagenome-assembled Genome sample from Laspinema sp.
				SAMN30074945	MIMS Environmental/Metagenome sample from Laspinema sp.
Microcoleus vaginatus	PMC 879.14	PRJNA686244	Microcoleus vaginatus PMC 879.14 Metagenome sequencing and assembly	SAMN17109600	MIMAG Metagenome-assembled Genome sample from Microcoleus vaginatus
				SAMN30074959	MIMS Environmental/Metagenome sample from Microcoleus vaginatus metagenome
Lyngbya martensiana	PMC 880.14	PRJNA686257	Lyngbya martensiana PMC 880.14 Metagenome sequencing and assembly	SAMN17109947	MIMAG Metagenome-assembled Genome sample from Lyngbya martensiana
				SAMN30076195	MIMS Environmental/Metagenome sample from Lyngbya martensiana metagenome
Nostoc sp.	PMC 881.14	PRJNA686258	Nostoc sp. PMC 881.14 Metagenome sequencing and assembly	SAMN17111856	MIMAG Metagenome-assembled Genome sample from Nostoc sp.
				SAMN30076262	MIMS Environmental/Metagenome sample from Nostoc sp. metagenome
Aliinostoc sp.	PMC 882.14	PRJNA686259	Aliinostoc sp. PMC 882.14 Metagenome sequencing and assembly	SAMN17111861	MIMAG Metagenome-assembled Genome sample from Aliinostoc sp.
				SAMN30076287	MIMS Environmental/Metagenome sample from Aliinostoc sp. metagenome
Leptolyngbya boryana	PMC 883.14	PRJNA686260	Leptolyngbya boryana PMC 883.14 Metagenome sequencing and assembly	SAMN17111864	MIMAG Metagenome-assembled Genome sample from Leptolyngbya boryana
				SAMN30077550	MIMS Environmental/Metagenome sample from Leptolyngbya boryana metagenome
Dulcicalothrix sp.	PMC 884.14	PRJNA686262	Dulcicalothrix sp. PMC 884.14 Metagenome sequencing and assembly	SAMN17111867	MIMAG Metagenome-assembled Genome sample from Calothrix sp.
				SAMN30077795	MIMS Environmental/Metagenome sample from Dulcicalothrix sp. metagenome
Pseudochroococcus couei	PMC 885.14	PRJNA686263	Pseudochroococcus couteii PMC 885.14 Metagenome sequencing and assembly	SAMN17112191	MIMAG Metagenome-assembled Genome sample from Pseudochroococcus coutei
				SAMN30077810	MIMS Environmental/Metagenome sample from Pseudochroococcus coutei metagenome

## Sheet: Supplemntary table S2 KEGG
Supp. table S2. Selected list of significantly different KEGG pathways between the metagenomes of the 9 cyanobacterial strains and their respective cyanosphere.
KEGG Patways			Reaction number	Cyanobacteria									Armatimonadetes		Bacteroidetes				Chloroflexi	Gemmatimonadetes	Planctomycetes	Proteobacteria									Verrucomicrobia
AMINO ACID METABOLISM				PMC 877.14	PMC 878.14	PMC 879.14	PMC 880.14	PMC 881.14	PMC 882.14	PMC 883.14	PMC 884.14	PMC 885.14	PMC 882.14	PMC 883.14	PMC 877.14	PMC 880.14	PMC 884.14	PMC 885.14	PMC 883.14	PMC 880.14	PMC 880.14	PMC 877.14	PMC 878.14	PMC 879.14	PMC 880.14	PMC 881.14	PMC 882.14	PMC 883.14	PMC 884.14	PMC 885.14	PMC 880.14
	Cys and Met metabolism	Cysteine biosynthesis, homocysteine + serine => cysteine	2	0	0	0	0	0	0.5	0	0.5	0	0	0	1	1	0.5	0.5	0.5	1	0.5	0.5	1	1	1	1	0.5	0	1	0.5	0.5
	Cys and Met metabolism	Methionine biosynthesis, apartate => homoserine => methionine	9	0.56	0.56	0.56	0.56	0.56	0.56	0.56	0.67	0.56	0.78	0.67	0.56	0.67	0.67	0.67	0.67	0.78	0.67	0.56	0.78	0.78	1	1	0.56	0.78	1	1	0.78
	Gly, Ser and Thr metabolism	Ectoine biosynthesis, aspartate => ectoine	5	0.6	0.4	0.6	0.4	0.6	0.6	0.4	0.6	0.6	0.4	0.4	0.4	0.4	0.4	0.4	0.4	0.4	0.6	0.4	0.4	0.4	0.4	0.4	0.4	0.4	0.4	0.6	0.4
	Gly, Ser and Thr metabolism	Serine biosynthesis, glycerate-3P => serine	3	0.33	0.33	0.67	0.33	0.33	1	0.67	0.67	0.33	1	0.67	1	1	0.67	0.67	0.33	0.67	1	1	1	1	1	1	1	1	1	1	0.67
	His metabolism	Histidine degradation, histidine => N-formiminoglutamate => glutamate	7	0	0	0.14	0	0	0	0.14	0	0	0.71	0.14	0.57	0.57	0.57	0.57	0.14	0.71	0	0.71	0.71	0.71	0.71	0.71	0	0	0.71	0.57	0
	Lys biosynthesis	Lysine biosynthesis, succinyl-DAP pathway, aspartate => lysine	10	0.7	0.7	0.7	0.7	0.7	0.7	0.7	0.7	0.7	1	1	0.8	0.8	0.8	0.8	0.4	0.8	0.7	0.9	1	1	1	1	1	1	1	1	0.8
	Lys biosynthesis	Lysine degradation, lysine => saccharopine => acetoacetyl-CoA	9	0.11	0.11	0.11	0.11	0.11	0.33	0.22	0.11	0.11	0.33	0.33	0.33	0.44	0.44	0.44	0.33	0.44	0.33	0.33	0.44	0.56	0.56	0.56	0.33	0.56	0.44	0.56	0.33
	Phe metabolism	Phenylacetate degradation, phenylaxetate => acetyl-CoA/succinyl-CoA	9	0	0	0	0	0.11	0.11	0.22	0.11	0	0.22	0.22	0.22	0.44	0.33	0.33	0.33	0.33	0.33	0.44	0.44	0.33	0.44	0.44	0.56	0.44	0.33	0.56	0.44
	Phe, Tyr and Trp biosynthesis	Phenylalanine biosynthesis, chorismate => arogenate => phenylalanine	4	0.5	0.5	0.5	0.5	0.5	0.5	0.5	0.5	0.5	0.75	0.5	0.75	1	0.75	1	0.5	0.5	0.5	0.75	0.75	1	1	1	0.75	0.75	0.75	1	0.5
	Val, Leu and Iso degradation	Leucine degradation, leucine => acetoacetate + acetyl-CoA	9	0.11	0.11	0.22	0.11	0.22	0.22	0.33	0.22	0.22	0.78	0.78	0.67	0.67	0.56	0.67	0.33	0.56	0.33	0.67	0.89	0.89	1	0.89	0.89	0.56	0.78	0.67	0.44
	Val, Leu and Iso degradation	Propanoyl-CoA metabolism, propanoyl-CoA => succinyl-CoA	3	0	0	0	0	0	0	0	0	0	0.33	0	1	1	0.33	0.67	0.67	0.67	0	1	1	1	1	1	1	1	1	1	0
CARBOHYDRATE METABOLISM
	Citrate cycle (TCA cycle)	Citrate cycle (TCA cycle, Krebs cycle)	21	0.52	0.52	0.52	0.57	0.52	0.52	0.62	0.52	0.57	0.62	0.62	0.67	0.71	0.71	0.71	0.71	0.71	0.76	0.71	0.76	0.71	0.86	0.86	0.71	0.71	0.81	0.67	0.71
	Glyoxylate and dicarboxylate metabolism	Ethylmalonyl pathway	14	0.14	0	0	0	0	0	0.07	0	0	0.14	0.07	0.36	0.43	0.21	0.29	0.29	0.29	0	0.57	0.64	0.57	0.86	0.86	0.64	0.64	0.57	1	0.07
	Glyoxylate and dicarboxylate metabolism	Propanoyl-CoA metabolism, propanoyl-CoA => succinyl-CoA	3	0	0	0	0	0	0	0	0	0	0.33	0	1	1	0.33	0.67	0.67	0.67	0	1	1	1	1	1	1	1	1	1	0
	Pyruvate metabolism	C4-dicarboxylic acid cycle, NADP - malic enzyme type	4	0.25	0.25	0.25	0.25	0.25	0.25	0.25	0.25	0.25	0.75	0.5	0.5	0.75	0.5	0.5	0.5	0.25	0.5	0.75	0.75	0.75	0.75	0.75	0.75	0.75	0.75	0.75	0.5
	Pyruvate metabolism	CAM (Crassulacean acid metabolism), light	2	0	0	0	0	0	0	0	0	0	1	0.5	0.5	1	0.5	0.5	0.5	0.5	0.5	1	1	1	1	1	1	1	1	1	0.5
	Glycolysis / Gluconeogenesis	Glycolysis (Embden-Meyerhof pathway), glucose => pyruvate	15	0.8	0.73	0.73	0.73	0.8	0.73	0.67	0.8	0.73	0.6	0.6	0.6	0.67	0.6	0.6	0.73	0.6	0.73	0.53	0.6	0.6	0.73	0.67	0.53	0.53	0.53	0.67	0.73
	Amylum and sucrose metabolism	Trehalose biosynthesis, D-glucose 1P => trehalose	6	0.5	0.83	0.83	0.83	0.83	0.83	0.83	0.67	1	0.33	0.33	0	0.5	0.5	0.5	0.5	0.5	0.5	0	0	0.5	0.83	0.83	0.5	0	0.5	0.67	0.83
ENERGY METABOLISM
	Carbon fixation pathways in prokaryotes	Hydroxypropionate cycle	18	0.11	0.11	0.11	0.11	0.11	0.11	0.17	0.11	0.17	0.28	0.22	0.22	0.39	0.22	0.33	0.22	0.28	0.22	0.44	0.44	0.33	0.78	0.78	0.44	0.39	0.39	0.61	0.17
	Carbon fixation pathways in prokaryotes	Incomplete reductive citrate cycle, acetyl-CoA => oxoglutarate	7	0.29	0.29	0.29	0.29	0.29	0.29	0.43	0.29	0.43	0.43	0.29	0.57	0.71	0.57	0.57	0.71	0.57	0.57	0.57	0.57	0.57	0.71	0.71	0.57	0.57	0.57	0.57	0.71
	Methane metabolism	F420 biosynthesis	6	0.33	0.33	0.33	0.33	0.33	0.17	0.33	0.33	0.33	0	0	0	0	0	0	0.5	0	0	0	0	0	0	0	0	0	0	0	0
	Nitrogen metabolism	Nitrogen fixation, nitrogen => ammonia	2	0	0	0	0	0.5	0.5	0.5	0.5	0.5	0	0	0	0	0	0	0	0	0	0	0	0	0	0.5	0	0	0	0	0
	Oxidative phosphorylation	NADH:quinone oxidoreductase, prokaryotes	1	0	0	0	0	0	0	0	0	0	1	1	0	1	1	1	1	1	1	1	1	1	1	1	1	0	1	1	1
	Oxidative phosphorylation	Fumarate reductase, prokaryotes	1	1	1	1	1	1	1	1	1	1	1	1	0	0	0	0	0	0	1	0	0	0	1	1	0	0	1	0	0
	Oxidative phosphorylation	Succinate dehydrogenase, prokaryotes	1	1	1	1	1	1	1	1	1	1	1	1	0	0	0	0	0	0	1	0	0	0	1	1	0	0	1	0	0
LIPID METABOLISM
	alpha-Linolenic acid metabolism	Jasmonic acid biosynthesis	18	0	0	0	0	0	0	0.33	0	0	0.33	0.33	0.33	0.5	0.5	0.5	0.5	0.5	0.33	0.56	0.56	0.56	0.5	0.5	0.5	0.5	0.5	0.5	0.5
	Biosynthesis of unsaturated fatty acids	beta-Oxidation, peroxisome, VLCFA	8	0	0	0	0	0	0	0.25	0	0	0	0	0.25	0.5	0.25	0.25	0.5	0.25	0	0.25	0.25	0.25	0.5	0.5	0.25	0.5	0.5	0.5	0.25
	Fatty acid degradation	beta-Oxidation	28	0.07	0	0	0	0	0.07	0.75	0.07	0	0.64	0.57	0.57	0.82	0.75	0.82	0.82	0.75	0.5	0.82	0.82	0.82	1	0.82	0.82	0.82	0.82	0.82	0.75
	Fatty acid elongation	Fatty acid elongation in mitochondria	28	0.04	0	0	0	0	0	0.5	0	0	0.54	0.54	0.5	0.75	0.75	0.75	0.75	0.75	0.5	0.75	0.75	0.75	0.75	1	0.75	0.75	0.75	0.75	0.75
	Glycerophospholipid metabolism	Phosphatidylethanolamine (PE) biosynthesis, PA => PS => PE	3	0.33	0.33	0.33	0.33	0.33	0.33	0.33	0.33	0.33	0.33	0.33	1	1	1	1	0.33	1	0.33	1	1	1	1	1	1	0.67	1	1	1
	Ketone body biosynthesis	Ketone body biosynthesis, acetyl-CoA => acetoacetate/3-hydroxybutyrate/acetone	5	0.2	0	0	0	0	0	0.2	0	0	0.4	0.6	0.2	0.6	0.2	0.4	0.4	0.2	0	0.4	0.8	0.6	0.8	1	0.6	0.6	0.8	0.8	0.2
METABOLISM OF COFACTORS AND VITAMINS
	Ubiquinone/terpenoid-quinone biosynthesis	Menaquinone biosynthesis, chorismate => menaquinol	9	0.78	0.78	0.78	0.67	0.78	0.78	0.78	0.78	0.67	0.22	0.22	0.56	0.44	0.11	0.56	0.89	0.11	0.22	0	0.22	0.11	0.33	0.56	0.33	0.22	0.22	0.22	0.56
	Ubiquinone/terpenoid-quinone biosynthesis	Tocopherol/tocotorienol biosynthesis	12	0.42	0.58	0.42	0.42	0.58	0.58	0.58	0.58	0.42	0	0	0	0	0	0	0	0	0	0	0	0	0	0	0	0	0	0	0
	Carotenoid biosynthesis	beta-Carotene biosynthesis, GGAP => beta-carotene	10	0.4	0.4	0.4	0.4	0.4	0.4	0.4	0.6	0.4	0.2	0	0.2	0.2	0.2	0.2	0.2	0.2	0.2	0.2	0.4	0.4	0.4	0.4	0.4	0	0.4	0.2	0.2
	beta-Alanine metabolism	Malonate semialdehyde pathway, propanoyl-CoA => acetyl-CoA	7	0	0	0	0	0	0.14	0.14	0.29	0	0.29	0.14	0.14	0.29	0.14	0.29	0.43	0.14	0.14	0.43	0.43	0.43	0.57	0.57	0.43	0.43	0.43	0.57	0.14
	Terpenoid backbone biosynthesis	C10-C20 isoprenoid biosynthesis, bacteria	4	0.5	0.5	0.5	0.5	0.5	0.5	0.5	0.5	0.5	0.75	0.75	1	1	1	1	1	0.5	0.75	0.5	1	1	1	0.75	0.5	0.75	1	1	0.75
NUCLEOTIDE METABOLISM
	Pyrimidine metabolism	Pyrimidine deoxyribonuleotide biosynthesis, CDP/CTP => dCDP/dCTP,dTDP/dTTP	9	0.44	0.56	0.33	0.56	0.33	0.33	0.56	0.56	0.56	0.56	0.56	0.67	0.67	0.67	0.78	0.67	0.56	0.67	0.78	0.78	0.89	0.78	0.78	0.78	0.78	0.78	0.78	0.56
XENOBIOTICS BIODEGRADATION AND METABOLISM
	Toluene degradation	Toluene degradation, anaerobic, toluene => benzoyl-CoA	6	0	0	0	0	0	0	0.17	0	0	0.17	0.17	0.17	0.17	0.17	0.17	0.17	0.17	0.17	0.17	0.17	0.17	0.33	0.33	0.33	0.33	0.33	0.17	0.17

## Sheet: Supplementary table S3 MetaCyc
Supp. table S3. Selected list of significantly different MetaCyc pathways between the metagenomes of the 9 cyanobacterial strains and their respective cyanosphere.
MetaCyc Patways			Reaction number	Cyanobacteria									Armatimonadetes		Bacteroidetes				Chloroflexi	Gemmatimonadetes	Planctomycetes	Proteobacteria									Verrucomicrobia
BIOSYNTHESIS				PMC 877.14	PMC 878.14	PMC 879.14	PMC 880.14	PMC 881.14	PMC 882.14	PMC 883.14	PMC 884.14	PMC 885.14	PMC 882.14	PMC 883.14	PMC 877.14	PMC 880.14	PMC 884.14	PMC 885.14	PMC 883.14	PMC 880.14	PMC 880.14	PMC 877.14	PMC 878.14	PMC 879.14	PMC 880.14	PMC 881.14	PMC 882.14	PMC 883.14	PMC 884.14	PMC 885.14	PMC 880.14
	Amines and Polyamines Biosynthesis	arginine degradation III	2	0.5	0.5	1	1	1	1	1	1	1	0	0	1	0	0	0	0	0	0	0	0	0	0	0	0	0	0	0	0
	Amines and Polyamines Biosynthesis	ectoine biosynthesis	5	0.6	0.4	0.6	0.4	0.6	0.6	0.4	0.6	0.6	0	0	0.4	0	0	0	0	0	0.2	0.4	0.2	0.2	0.2	0.2	0	0.2	0	0.2	0
	Amines and Polyamines Biosynthesis	putrescine biosynthesis I	2	0.5	0.5	1	1	1	1	1	1	1	0	0	1	0	0	0	0	0	0	0	0	0	0	0	0	0	0	0	0
	Amines and Polyamines Biosynthesis	urate biosynthesis/inosine 5'-phosphate degradation	4	0.5	0.5	0.5	0.75	0.75	0.5	0.75	0.5	0.5	0.25	0.25	0.75	0.25	0.25	0.25	0	0.25	0.25	0.25	0.25	0.25	0.5	0.5	0.25	0.25	0.5	0.5	0.25
	Amino Acids Biosynthesis	alanine biosynthesis I	3	0.67	0.67	1	0.67	1	1	1	1	0.67	0	0	0.67	0	0	0	0.33	0.33	0	0.67	0	0.33	0.33	0.67	0	0	0	0.33	0
	Amino Acids Biosynthesis	arginine biosynthesis II	9	1	1	1	1	1	1	1	1	1	0.11	0.11	0.22	0.11	0	0.11	0.11	0.33	0.22	0.89	0.22	0.22	0.22	0.33	0.11	0.11	0.22	0.33	0.22
	Amino Acids Biosynthesis	asparagine biosynthesis III	3	0.33	0.67	0.67	0.67	0.67	0.67	0.67	0.33	0.33	0	0	0	0	0	0	0	0	0	0.67	0	0	0	0	0	0	0	0	0
	Amino Acids Biosynthesis	aspartate biosynthesis	1	1	1	1	1	1	1	1	1	1	0	0	1	0	0	0	0	0	1	1	0	0	0	1	0	0	0	0	0
	Amino Acids Biosynthesis	citrulline-nitric oxide cycle	3	0.67	0.67	1	0.67	0.67	0.67	0.67	0.67	0.67	0.33	0.33	0	0	0	0	0	0.67	0.33	0.33	0.33	0.33	0.33	0	0	0	0	0.33	0
	Amino Acids Biosynthesis	glutamate degradation II	2	1	1	1	1	1	1	0.5	1	0.5	0	0	0.5	0	0	0	0	0	0.5	0.5	0	0	0	1	0	0	0	0.5	0
	Amino Acids Biosynthesis	homoserine biosynthesis	3	1	1	1	1	1	1	1	1	1	0	0	1	0	0	0	0	0	0.33	1	0.33	0.33	0.33	0.67	0	0.33	0	0.33	0
	Amino Acids Biosynthesis	L-glutamine biosynthesis II	2	0.5	0.5	0.5	0.5	0.5	0.5	0.5	0.5	0.5	0	0	0	0	0	0	0	0	0	1	0	0	0	0	0	0	0	0	0
	Amino Acids Biosynthesis	lysine biosynthesis VI	7	1	1	1	1	1	1	1	1	1	0	0	0.86	0	0	0	0	0	0.29	0.86	0.43	0.57	0.57	0.57	0	0.43	0	0.57	0
	Amino Acids Biosynthesis	methionine biosynthesis III	2	1	1	0.5	1	0.5	1	0.5	1	1	0.5	0	0	0	0	0	0	0.5	0.5	0	0	0	1	0.5	0	0	0.5	0.5	1
	Amino Acids Biosynthesis	ornithine biosynthesis	5	0.8	0.8	0.8	0.8	0.8	0.8	0.8	0.8	0.8	0	0	0.2	0	0	0	0	0	0	0.8	0	0	0	0.2	0	0	0	0	0.2
	Amino Acids Biosynthesis	phenylalanine biosynthesis I	3	0.67	0.67	1	0.67	0.67	1	1	1	1	0	0	0.67	0	0	0	0.33	0.33	0.33	1	0	0.33	0.33	0.33	0	0.33	0	0.33	0
	Amino Acids Biosynthesis	threonine biosynthesis from homoserine	2	1	1	1	1	1	1	1	1	1	0	0	0	0.5	0.5	0.5	0	0	0	1	0	0	0	0	0	0	0	0	0
	Amino Acids Biosynthesis	tryptophan biosynthesis	6	1	1	1	1	1	1	1	1	1	0.17	0.17	1	0.17	0.17	0.17	0.17	0.17	0.17	1	0.33	0.17	0.33	0.33	0.17	0.17	0.33	0.17	0.17
	Amino Acids Biosynthesis	tyrosine biosynthesis III	3	0.67	0.67	0.67	0.67	0.67	0.67	0.67	0.67	0.67	0	0	0.67	0	0	0	0	0	0	1	0	0	0	0	0	0	0	0	0
	Amino Acids Biosynthesis	valine biosynthesis	4	0.75	0.75	1	0.75	1	1	1	1	1	0.5	0.5	0.25	0.25	0.25	0.25	0.5	0.25	0	1	0.5	0.25	0.5	0.75	0.25	0.5	0.5	0.5	0.5
	Carbohydrates Biosynthesis	acetaldehyde biosynthesis I	2	1	1	1	1	1	1	1	1	1	0	0	0	0	0	0	0	0	0	0.5	0	0	0	0	0	0	0	0	0
	Carbohydrates Biosynthesis	Calvin-Benson-Bassham cycle	13	0.92	0.85	0.92	0.85	0.92	0.92	0.92	0.92	0.92	0.31	0.23	0.77	0.23	0.31	0.31	0.46	0.31	0.08	0.54	0.38	0.38	0.38	0.38	0.31	0.38	0.31	0.46	0
	Carbohydrates Biosynthesis	galactose degradation III	6	0.83	0.83	1	1	0.83	1	1	1	0.67	0	0	0.33	0	0	0	0.17	0	0	0.5	0.33	0	0	0.33	0.17	0	0.17	0.17	0.17
	Carbohydrates Biosynthesis	GDP-mannose biosynthesis	4	1	1	1	1	1	1	1	1	1	0.25	0.25	0.75	0.25	0.25	0.25	0	0	0.25	0.75	0	0.25	0.75	0.5	0	0.25	0.25	0.5	0
	Carbohydrates Biosynthesis	gluconeogenesis II	20	0.55	0.55	0.55	0.6	0.55	0.55	0.55	0.6	0.55	0.15	0.1	0.65	0.3	0.15	0.25	0.1	0.15	0.15	0.55	0.25	0.3	0.3	0.25	0.2	0.25	0.2	0.35	0.1
	Carbohydrates Biosynthesis	glycogen degradation I	7	0.86	0.86	0.86	1	1	1	1	1	0.86	0	0	0.14	0	0	0	0	0	0	0.29	0	0.29	0.14	0.29	0.29	0	0.14	0.14	0
	Carbohydrates Biosynthesis	Amylum biosynthesis	5	1	0.8	0.8	1	1	1	1	1	1	0	0	0.6	0.2	0.2	0.2	0	0.2	0.2	0.2	0	0.4	0.6	0.4	0.4	0	0.4	0.4	0
	Carbohydrates Biosynthesis	trehalose biosynthesis V	3	0.33	0.67	0.67	0.67	0.67	0.67	0.67	0.33	1	0	0	0	0	0	0	0	0	0	0	0	0	0	0	0	0	0	0	0
	Carbohydrates Biosynthesis	sucrose biosynthesis	9	0.89	0.89	0.78	0.89	1	0.89	0.89	1	0.89	0.22	0.11	0.67	0.44	0.44	0.56	0.44	0.22	0.22	0.67	0.33	0.22	0.33	0.22	0.22	0.22	0.22	0.22	0.11
	Cell Structures Biosynthesis	colanic acid building blocks biosynthesis	11	0.91	0.91	1	1	0.91	1	1	1	0.82	0.36	0.27	0.45	0.36	0.27	0.36	0.18	0	0.27	0.55	0.36	0.18	0.36	0.64	0.18	0.18	0.45	0.45	0.36
	Cell Structures Biosynthesis	peptidoglycan biosynthesis III (mycobacteria)	14	0.71	0.71	0.71	0.71	0.71	0.71	0.71	0.71	0.71	0	0	0.71	0	0	0	0	0	0	0.71	0.36	0.29	0.29	0.36	0.14	0.21	0.21	0.36	0.14
	Cofactors, Electron Carriers Biosynthesis	di-trans,poly-cis-undecaprenyl-P biosynthesis	1	1	0	0	0	0	1	0	0	0	1	1	1	1	1	1	1	1	0	1	1	1	1	1	1	1	1	1	1
	Cofactors, Electron Carriers Biosynthesis	menaquinol-8 biosynthesis	1	0	0	0	0	0	0	0	0	0	0	0	1	0	0	0	0	0	0	1	1	1	1	1	1	1	1	1	0
	Cofactors, Electron Carriers Biosynthesis	1,4-dihydroxy-2-naphthoate biosynthesis I	7	1	1	1	0.86	1	1	1	1	0.86	0	0	0.57	0.14	0	0.14	0.14	0	0	0	0.14	0.14	0.14	0.14	0	0.14	0.29	0.14	0.14
	Cofactors, Electron Carriers Biosynthesis	adenosylcobalamin biosynthesis II	21	0.57	0.57	0.76	0.52	0.67	0.62	0.76	0.71	0.67	0	0	0.05	0	0	0	0	0	0	0.43	0	0	0	0.05	0	0	0	0	0
	Cofactors, Electron Carriers Biosynthesis	chlorophyllide a biosynthesis I	10	0.9	0.8	0.9	0.8	0.8	0.8	0.8	0.9	0.9	0	0	0.3	0	0	0.1	0	0	0	0.3	0.2	0.2	0.2	0.2	0	0.2	0	0.1	0
	Cofactors, Electron Carriers Biosynthesis	flavin biosynthesis I (bacteria and plants)	9	0.89	0.89	0.89	0.89	0.89	0.89	0.89	0.89	0.89	0	0	0.89	0	0	0	0	0.33	0	0.89	0.33	0.44	0.67	0.67	0.33	0.33	0.56	0.56	0
	Cofactors, Electron Carriers Biosynthesis	glutathione biosynthesis	2	1	1	1	1	1	1	1	1	1	0	0	0	0	0	0	0	0	0	1	0.5	0	0.5	0.5	0	0	0	0	0
	Cofactors, Electron Carriers Biosynthesis	heme biosynthesis from uroporphyrinogen-III I	4	1	0.75	1	0.75	0.75	0.75	0.75	1	1	0	0	1	0	0	0.25	0	0	0	1	0.5	0.5	0.5	0.5	0	0.5	0	0.25	0
	Cofactors, Electron Carriers Biosynthesis	NAD salvage pathway I	8	0.5	0.5	0.5	0.63	0.5	0.5	0.5	0.63	0.5	0	0	0.38	0.13	0	0	0	0	0	0.5	0	0	0	0	0	0	0	0	0
	Cofactors, Electron Carriers Biosynthesis	phycocyanobilin biosynthesis	2	1	1	1	1	1	1	1	1	1	0	0	0	0	0	0	0	0	0	0	0	0	0	0	0	0	0	0	0
	Cofactors, Electron Carriers Biosynthesis	phycoerythrobilin biosynthesis	3	1	0.33	0.33	0.33	1	0.33	0.33	1	1	0	0	0	0	0	0	0	0	0	0	0	0	0	0	0	0	0	0	0
	Cofactors, Electron Carriers Biosynthesis	siroheme biosynthesis	4	0.5	0.5	0.5	0.5	0.5	0.5	0.5	0.5	0.5	0	0	0	0	0	0	0	0	0	0.5	0	0	0	0	0	0	0	0	0
	Cofactors, Electron Carriers Biosynthesis	tetrahydrobiopterin biosynthesis I	3	0.33	0.33	0.67	0.67	0.67	0.67	0.67	0.67	0.67	0	0	0.67	0.33	0.33	0.33	0	0	0	0.33	0	0	0	0	0	0	0	0	0
	Cofactors, Electron Carriers Biosynthesis	vitamin E biosynthesis	7	0.71	0.71	0.71	0.71	0.71	0.71	0.71	0.71	0.71	0	0	0.14	0	0	0	0	0	0	0.14	0	0	0	0	0	0	0	0	0
	Fatty Acids and Lipids Biosynthesis	phosphatidylglycerol biosynthesis I (plastidic)	6	0.83	0.83	0.83	0.83	0.83	0.83	0.83	0.83	0.83	0	0	0.5	0	0	0	0	0	0	1	0.17	0.33	0.33	0.5	0	0.33	0	0.17	0
	Fatty Acids and Lipids Biosynthesis	γ-linolenate biosynthesis II (animals)	2	1	1	0.5	0.5	0.5	0.5	0.5	1	0.5	0	0	1	0	0	0	0	0	0	0.5	0	0	0	0	0	0	0	0	0
	Nucleosides and Nucleotides Biosynthesis	salvage pathways of pyrimidine ribonucleotides	8	0.75	0.5	0.63	0.63	0.75	0.75	0.63	0.75	0.63	0	0	0.75	0.13	0.13	0.13	0	0.13	0	0.38	0.13	0.38	0.38	0.38	0.13	0.25	0.25	0.38	0
	Nucleosides and Nucleotides Biosynthesis	tRNA processing pathway I	10	0.7	0.7	0.8	0.7	0.7	0.8	0.8	0.7	0.7	0.1	0.1	0.5	0.1	0.1	0.1	0.1	0.1	0.1	0.9	0.3	0.3	0.3	0.5	0.1	0.1	0.1	0.3	0.1
	Secondary Metabolites Biosynthesis	1,4-dihydroxy-2-naphthoate biosynthesis II (plants)	7	1	1	1	0.86	1	1	1	1	0.86	0	0	0.43	0.14	0	0.14	0.14	0	0	0	0.14	0.14	0.14	0.14	0	0.14	0.29	0.14	0.14
	Secondary Metabolites Biosynthesis	neurosporene biosynthesis	5	1	0.6	0.8	0.8	0.6	0.8	0.6	1	0.8	0	0	0.4	0	0	0	0	0	0	1	0	0	0	0	0	0	0	0	0
	Secondary Metabolites Biosynthesis	trans-lycopene biosynthesis I (bacteria)	6	1	0.67	0.83	0.83	0.67	0.83	0.67	1	0.83	0	0	0.33	0	0	0	0	0	0	1	0	0	0	0	0	0	0	0	0
	Secondary Metabolites Biosynthesis	zeaxanthin biosynthesis	2	1	1	1	1	1	1	1	1	1	0	0	1	0	0	0	0	0	0	1	0	0	0	0	0	0	0	0	0
	Secondary Metabolites Biosynthesis	zeaxanthin-β-D-diglucoside biosynthesis	2	1	1	1	1	1	0	0	1	0	0	0	0	0	0	0	0	0	0	0	0	0	0	0	0	0	0	0	0
DEGRADATION/UTILIZATION/ASSIMILATION
	Alcohols Degradation	ethanol degradation I	2	1	1	1	1	1	1	1	1	1	0	0	0	0	0	0	0	0	0	1	0.5	0	0	0	0.5	0	0.5	0	0
	Alcohols Degradation	glycerol degradation V	2	0.5	0.5	0.5	0.5	1	1	0.5	1	0.5	0	0	0	0	0	0	0	0	0	0	0	0	0	0.5	0	0	0	0.5	0.5
	Amino Acids Degradation	alanine degradation IV	1	0	1	1	1	1	1	1	1	1	0	0	1	0	0	0	0	0	0	1	0	0	0	0	0	0	0	0	0
	Amino Acids Degradation	arginine degradation III (arginine decarboxylase/agmatinase pathway)	2	0.5	0.5	1	1	1	1	1	1	1	0	0	1	0	0	0	0	0	0	0	0	0	0	0	0	0	0	0	0
	Amino Acids Degradation	aspartate degradation II	2	1	1	1	1	1	1	1	1	1	0	0	1	0	0	0	0	0	0.5	1	0	0	0	0.5	0	0	0	0	0
	Amino Acids Degradation	glutamate degradation II	2	1	1	1	1	1	1	0.5	1	0.5	0	0	0.5	0	0	0	0	0	0.5	0.5	0	0	0	1	0	0	0	0.5	0
	C1 Compounds Utilization and Assimilation	Calvin-Benson-Bassham cycle	13	0.92	0.85	0.92	0.85	0.92	0.92	0.92	0.92	0.92	0.31	0.23	0.77	0.23	0.31	0.31	0.46	0.31	0.08	0.54	0.38	0.38	0.38	0.38	0.31	0.38	0.31	0.46	0
	C1 Compounds Utilization and Assimilation	CO2 fixation into oxaloacetate (anapleurotic)	2	1	1	1	1	1	1	1	1	1	0.5	0.5	1	0.5	0	0	0	0	0	1	0.5	0.5	0.5	0	0	0.5	0	0.5	0.5
	Carbohydrates Degradation	D-mannose degradation	1	1	1	1	1	1	1	1	1	1	0	0	1	0	0	0	0	0	0	1	0	0	0	0	0	0	0	0	0
	Carbohydrates Degradation	galactose degradation III	6	0.83	0.83	1	1	0.83	1	1	1	0.67	0	0	0.33	0	0	0	0.17	0	0	0.5	0.33	0	0	0.33	0.17	0	0.17	0.17	0.17
	Carbohydrates Degradation	glycogen degradation I	7	0.86	0.86	0.86	1	1	1	1	1	0.86	0	0	0.14	0	0	0	0	0	0	0.29	0	0.29	0.14	0.29	0.29	0	0.14	0.14	0
	Carbohydrates Degradation	amylum degradation V	4	0.75	0.5	0.5	1	0.75	0.75	0.75	0.75	0.5	0	0	0.25	0	0	0	0	0	0	0	0	0	0	0	0	0	0	0	0
	Carbohydrates Degradation	sucrose degradation IV	4	0.75	0.5	0.5	0.75	0.75	0.75	0.5	1	0.75	0	0	0.5	0.25	0.25	0.25	0	0.25	0.25	0.5	0	0	0.25	0.25	0	0	0.25	0.25	0
	Carbohydrates Degradation	trehalose degradation IV	3	0.67	0.67	0.67	1	1	0.67	1	1	0.67	0	0	0.33	0.33	0	0.33	0	0	0	0.67	0	0	0	0	0	0	0	0	0
	Inorganic Nutrients Metabolism	ammonia assimilation cycle II	2	1	1	1	1	1	1	1	1	1	0.5	0.5	0.5	0	0	0	0	0	0	0.5	0.5	0.5	0.5	0.5	0.5	0.5	0.5	0.5	0
	Inorganic Nutrients Metabolism	ammonium transport	1	1	1	1	1	1	1	1	1	1	0	0	0	0	0	0	0	0	0	1	0	0	0	0	0	0	0	0	0
	Inorganic Nutrients Metabolism	nitrate reduction IV (dissimilatory)	2	0.5	0.5	0.5	0.5	0.5	0.5	1	0.5	0.5	0	0	0	0	0	0	0	0	0	0.5	0	0	0	0	0	0	0	0	0
	Inorganic Nutrients Metabolism	nitrogen fixation	1	1	0	0	1	1	1	1	1	1	0	0	0	0	0	0	0	0	0	0	0	0	0	0	0	0	0	0	0
	Secondary Metabolites Degradation	N-acetylglucosamine degradation I	2	0.5	1	0.5	1	1	1	0.5	1	0.5	0	0	0	0	0	0	0	0	0	1	0	0	0	0	0	0	0	0	0
ENERGY PRODUCTION
	TCA cycle	TCA cycle VI (obligate autotrophs)	11	0.91	0.91	0.91	0.91	0.91	0.91	1	0.91	1	0.55	0.36	1	0.36	0.27	0.27	0.45	0.27	0.55	1	0.73	0.73	0.64	0.82	0.64	0.73	0.64	0.73	0.45
	TCA cycle	Rubisco shunt	10	1	1	1	1	1	1	1	1	1	0.4	0.4	0.8	0.1	0.1	0.1	0.4	0.3	0.1	0.7	0.5	0.8	0.7	0.8	0.5	0.7	0.5	0.8	0.2
	Lipids Degradation (to TCA cycle)	acetoacetate degradation (to acetyl CoA)	2	0.5	0	0	0	0	0	0	0	0	0.5	0.5	1	0.5	0.5	1	0	0	0	1	1	1	1	1	0.5	1	1	1	0
	Fermentation	pyruvate fermentation to acetate VIII	2	1	1	1	1	1	1	1	1	0.5	0	0	0.5	0.5	0	0.5	0	0	0	0	0.5	0	0.5	0	0.5	0	0	0	0
	Glycolysis	glycolysis I	11	1	1	1	1	1	0.91	1	1	1	0.27	0.18	0.91	0.45	0.45	0.55	0.45	0.27	0.36	0.82	0.55	0.55	0.55	0.55	0.36	0.45	0.36	0.64	0.27
	Glycolysis	superpathway of glycolysis and Entner-Doudoroff	15	0.93	0.93	0.93	0.93	0.93	0.87	0.93	0.93	0.93	0.2	0.13	0.67	0.33	0.33	0.4	0.33	0.2	0.27	0.8	0.6	0.6	0.6	0.6	0.47	0.4	0.47	0.67	0.2
	Pentose Phosphate Pathways	pentose phosphate pathway (oxidative branch)	3	1	1	1	1	1	1	1	1	1	0	0	0	0	0	0	0	0	0.33	0.33	0.33	0.33	0.33	0.33	0.33	0	0.33	0.33	0.33
	Hydrogen Production	hydrogen production II	1	1	1	0	1	1	1	1	1	1	0	0	0	0	0	0	0	0	0	0	0	0	0	0	0	0	0	0	0
	Photosynthesis	photorespiration	9	0.56	0.56	0.56	0.67	0.67	0.67	0.56	0.67	0.67	0.22	0.22	0.22	0.22	0.22	0.22	0.11	0.22	0.22	0.33	0.22	0.22	0.22	0.22	0.22	0.22	0.22	0.22	0.11
	Photosynthesis	photosynthesis light reactions	4	1	1	1	1	1	1	1	1	1	0	0	0.25	0	0	0	0	0	0	0.25	0	0	0	0	0	0	0	0	0
	Respiration	nitrate reduction I (denitrification)	4	0.25	0.5	0.25	0.5	0.25	0.25	0.5	0.5	0.25	0	0	0.5	0	0	0	0	0	0	0.25	0	0	0	0	0	0	0	0	0
